# Supplementary material for: Assessing changing weather and the El Niño Southern Oscillation impacts on cattle rabies outbreaks and mortality in Costa Rica (1985–2016)
Source: PubMed Central journal article supplement (PMC6142330; doi:10.1186/s12917-018-1588-8), 2018-09-17
Supplement: 12917_2018_1588_MOESM5_ESM.pdf [file 12917_2018_1588_MOESM5_ESM.pdf]

**Supplementary Table S1** Selection of the best monthly cattle rabies outbreaks time series model. Columns indicate the type of model (models): full or the backward elimination round. The Akaike Information Criterion (AIC) is a model selection criterion which is minimized by the best model. The AIC for the best models of each selection round are **bolded**. o and x indicate, respectively, the presence or absence of a variable in a model. Temp is an abbreviation for temperature. Time lags are in months.

| Models    | Intercept | Covariates (Lag)   |           |          |          |           |          | AIC           |
|-----------|-----------|--------------------|-----------|----------|----------|-----------|----------|---------------|
|           |           | Autoregressive (3) | Temp (17) | Temp (4) | Rain(16) | Rain (11) | Rain (3) |               |
| Full      | o         | o                  | o         | o        | o        | o         | o        | <b>590.29</b> |
|           | o         | o                  | o         | o        | o        | o         | x        | 589.36        |
| 1st Round | o         | o                  | o         | o        | o        | x         | o        | <b>588.30</b> |
|           | o         | o                  | o         | o        | x        | o         | o        | 589.81        |
|           | o         | o                  | o         | x        | o        | o         | o        | 588.72        |
|           | o         | o                  | x         | o        | o        | o         | o        | 596.06        |
|           | o         | o                  | o         | o        | o        | x         | x        | 587.41        |
| 2nd Round | o         | o                  | o         | o        | x        | x         | o        | 587.96        |
|           | o         | o                  | o         | x        | o        | x         | o        | <b>586.72</b> |
|           | o         | o                  | x         | o        | o        | x         | o        | 595.26        |
| 3rd Round | o         | o                  | o         | x        | o        | x         | x        | 585.66        |
|           | o         | o                  | o         | x        | x        | x         | o        | 587.44        |
|           | o         | o                  | x         | x        | o        | x         | o        | 597.98        |
|           | o         | o                  | o         | x        | x        | x         | x        | <b>592.77</b> |
|           | o         | o                  | x         | x        | o        | x         | x        | 596.21        |
