# Supplementary material for: Assessing changing weather and the El Niño Southern Oscillation impacts on cattle rabies outbreaks and mortality in Costa Rica (1985–2016)
Source: PubMed Central journal article supplement (PMC6142330; doi:10.1186/s12917-018-1588-8), 2018-09-17
Supplement: 12917_2018_1588_MOESM6_ESM.pdf [file 12917_2018_1588_MOESM6_ESM.pdf]

**Supplementary Table S2** Selection of the best monthly cattle mortality time series model. Columns indicate the type of model: Null, or full model. The Akaike Information Criterion (AIC) is a model selection criterion which is minimized by the best model. The best model has its AIC **bolded**. o and x indicate, respectively, the presence or absence of a variable in a model. Temp is an abbreviation for temperature. Time lags are in months.

| Models      | Intercept | Covariates (Lag)   |           | AIC         |
|-------------|-----------|--------------------|-----------|-------------|
|             |           | Autoregressive (2) | Temp (17) |             |
| Null Models | o         | o                  | x         | 2522        |
| Full        | o         | o                  | o         | <b>2519</b> |
